# Supplementary material for: Development and Validation of the Schizophrenia Disease Burden Scale: A Comprehensive Patient-Reported Outcome Measure Incorporating Socioeconomic and Cultural Contexts
Source: Research Square preprint supplement (doi:10.21203/rs.3.rs-5517158/v1), 2025-03-31
Supplement: Supplementary file 1 [file 633c589eb9f7ddb590f14fa9.docx]

**மனச்சிதைவு நோயின் நோய் சுமை அளவுகோல்**

**நிலை 1: அறிவாற்றல் காரணிகள்**

| வினா | 1 | 2 | 3 | 4 | 5 |
| --- | --- | --- | --- | --- | --- |
| 1: எனது வேலை சுமைகளை சமாளிப்பது எனக்கு கடினமாக உள்ளது | முற்றிலுமாக உடன்படவில்லை | உடன்படவில்லை | உடன்படவுமில்லை மறுக்கவுமில்லை | ஒப்புக்கொள்கிறேன் | முற்றிலுமாக ஒப்புக்கொள்கிறேன் |
| 2: வேலைகளை சரியான நேரத்தில்/ காலக்கெடுவிற்கு முன் முடிப்பது எனக்கு கடினமாக உள்ளது | ஒருபோதும் இல்லை | அரிதாக | எப்போதாவது | அடிக்கடி | எப்பொழுதும் |
| 3: ஒரு பணியை எப்படி செய்வது என்று திட்டமிடுவது எனக்கு கடினமாக உள்ளது | முற்றிலுமாக உடன்படவில்லை | உடன்படவில்லை | உடன்படவுமில்லை மறுக்கவுமில்லை | ஒப்புக்கொள்கிறேன் | முற்றிலுமாக ஒப்புக்கொள்கிறேன் |
| 4: என்னால் முன்பு போல் திறமையாக வேலை செய்ய முடியவில்லை | முற்றிலுமாக உடன்படவில்லை | உடன்படவில்லை | உடன்படவுமில்லை மறுக்கவுமில்லை | ஒப்புக்கொள்கிறேன் | முற்றிலுமாக ஒப்புக்கொள்கிறேன் |
| 5: வேளையில் எனது கவனத்தை இழக்கிறேன். வேலை தொடர்பான நடவடிக்கையில் கவனம் செலுத்துவது கடினமாக உள்ளது | ஒருபோதும் இல்லை | அரிதாக | எப்போதாவது | அடிக்கடி | எப்பொழுதும் |
| 6: மற்றவர்கள் எனக்கு மாத்திரைகளை எடுத்துக்கொள்வதை நினைவூட்டவோ அல்லது கட்டாயப்படுத்தவோ வேண்டியுள்ளது | ஒருபோதும் இல்லை | அரிதாக | எப்போதாவது | அடிக்கடி | எப்பொழுதும் |

**நிலை 2: உளவியல் காரணிகள்**

| வினா | 1 | 2 | 3 | 4 | 5 |
| --- | --- | --- | --- | --- | --- |
| 7: நான் பொருளாதார ரீதியாக நிலையற்றவன். எனது செலவுகளை சமாளிக்க போதுமான பணம் இல்லை | இல்லவே இல்லை | கொஞ்சம் | கமிதமான அளவு | மிகுதியாக | முற்றிலுமாக |
| 8: எனது வேலை/கல்வி குறித்து நான் மிகவும் கவலைப்படுகிறேன் | ஒருபோதும் இல்லை | அரிதாக | எப்போதாவது | அடிக்கடி | எப்பொழுதும் |
| 9: நான் அடிக்கடி என் வேலையை விட்டுவிட்டு வேறு வேலைக்கு செல்கிறேன் | ஒருபோதும் இல்லை | அரிதாக | எப்போதாவது | அடிக்கடி | எப்பொழுதும் |
| 10: எனக்கு பாதுகாப்பின்மை உணர்வு உள்ளது. நான் வாழ்க்கையை பற்றி பயப்படுகிறேன் | இல்லவே இல்லை | கொஞ்சம் | கமிதமான அளவு | மிகுதியாக | முற்றிலுமாக |
| 11: நான் நம்பிக்கையற்றவனாக உணர்கிறேன் | இல்லவே இல்லை | கொஞ்சம் | கமிதமான அளவு | மிகுதியாக | முற்றிலுமாக |
| 12: குறிப்பிட்ட பணி/வேலையை நீண்ட நேரத்திற்கு செய்ய முடிவதில்லை | முற்றிலுமாக உடன்படவில்லை | உடன்படவில்லை | உடன்படவுமில்லை மறுக்கவுமில்லை | ஒப்புக்கொள்கிறேன் | முற்றிலுமாக ஒப்புக்கொள்கிறேன் |
| 13: என் வாழ்க்கையை முடித்துக்கொள்ளும் எண்ணங்கள் எனக்கு வருகின்றன | ஒருபோதும் இல்லை | அரிதாக | எப்போதாவது | அடிக்கடி | எப்பொழுதும் |

**நிலை 3: தனிப்பட்ட காரணிகள் I**

| வினா | 1 | 2 | 3 | 4 | 5 |
| --- | --- | --- | --- | --- | --- |
| 14: நான் மற்றவர்களிடமிருந்து எந்த அன்பையும், அக்கறையையும், பாசத்தையும் பெறுவதில்லை. | முற்றிலுமாக உடன்படவில்லை | உடன்படவில்லை | உடன்படவுமில்லை மறுக்கவுமில்லை | ஒப்புக்கொள்கிறேன் | முற்றிலுமாக ஒப்புக்கொள்கிறேன் |
| 15: என் குடும்பம் என்னை ஒரு சுமையாக கருதுகிறது. | முற்றிலுமாக உடன்படவில்லை | உடன்படவில்லை | உடன்படவுமில்லை மறுக்கவுமில்லை | ஒப்புக்கொள்கிறேன் | முற்றிலுமாக ஒப்புக்கொள்கிறேன் |
| 16: திடீர் அல்லது உரத்த சத்தங்களால் நான் எரிச்சலடைகிறேன் | ஒருபோதும் இல்லை | அரிதாக | எப்போதாவது | அடிக்கடி | எப்பொழுதும் |
| 17: நான் தனிமையாக உணர்கிறேன் | ஒருபோதும் இல்லை | அரிதாக | எப்போதாவது | அடிக்கடி | எப்பொழுதும் |

**நிலை 4: தனிப்பட்ட காரணிகள் II**

| வினா | 1 | 2 | 3 | 4 | 5 |
| --- | --- | --- | --- | --- | --- |
| 18. எனது உணர்வு மற்றும் சூழ்நிலைகளை யாரும் புரிந்து கொள்வதில்லை | முற்றிலுமாக உடன்படவில்லை | உடன்படவில்லை | உடன்படவுமில்லை மறுக்கவுமில்லை | ஒப்புக்கொள்கிறேன் | முற்றிலுமாக ஒப்புக்கொள்கிறேன் |
| 19. ஒரு விழா/சமூக கூட்டங்களில் கலந்துகொள்ள என்னை தயார்படுத்தும் போதெல்லாம், எனக்கு அழுத்தம் அல்லது பதற்றம் ஏற்படுகிறது | இல்லவே இல்லை | கொஞ்சம் | கமிதமான அளவு | மிகுதியாக | முற்றிலுமாக |
| 20. நான் வாழ்க்கையில் பின் தங்கியிருப்பதாக உணர்கிறேன் | இல்லவே இல்லை | கொஞ்சம் | கமிதமான அளவு | மிகுதியாக | முற்றிலுமாக |

**நிலை 5:** **தொழில்சார் காரணிகள்**

| வினா | 1 | 2 | 3 | 4 | 5 |
| --- | --- | --- | --- | --- | --- |
| 21: பணியிடத்தில் உங்கள் சக ஊழியர்கள் உங்களை எவவ்ளவு புரிந்துகொள்கிறார்கள் | மிகுந்த புரிதலுடன் இருக்கின்றனர் | புரிதலுடன் இருக்கின்றனர் | நடுநிலை | அதிகம் புரிதல் இல்லை | புரிதல் இல்லவே இல்லை |
| 22: பணியிடத்தில் உங்கள் சக ஊழியர்கள் எவ்ளவு ஆதரவாக இருக்கிறார்கள் | மிகவும் ஆதரவாக உள்ளார்கள் | ஆதரவாக உள்ளார்கள் | நடுநிலை | அதிக ஆதரவு இல்ல | ஆதரவாகவே இல்ல |

**நிலை 6:** **இயற்பியல் காரணிகள்**

| வினா | 1 | 2 | 3 | 4 | 5 |
| --- | --- | --- | --- | --- | --- |
| 23: எனக்கு கை நடுக்கம் ஏற்படுகிறது | ஒருபோதும் இல்லை | அரிதாக | எப்போதாவது | அடிக்கடி | எப்பொழுதும் |
| 24: மருந்துகள் இல்லாமல் தூங்குவது எனக்கு கடினம் | முற்றிலுமாக உடன்படவில்லை | உடன்படவில்லை | உடன்படவுமில்லை மறுக்கவுமில்லை | ஒப்புக்கொள்கிறேன் | முற்றிலுமாக ஒப்புக்கொள்கிறேன் |

**கேள்வியின் மையக்கரு**

வேலை திறன்: 1, 2, 3, 4, 5

சுய பராமரிப்பு: 6

பொருளாதாரம்: 7

உணர்ச்சிகள்: 8, 13, 16

நடத்தை: 9, 10

தன்முக உணர்வு: 11, 12, 20

மற்றவர்களுடனான உறவுநிலை: 14, 17, 18

குடும்ப தொடர்புகள்: 15

சமூக பங்கேற்பு: 19

வேலை சூழல்: 21, 22

உடலியல் அறிகுறிகள்: 23

உறக்கம்: 24

**மதிப்பிடும் முறை:**

ஐந்து புள்ளி லைக்கார்ட் அளவுகோலின் அடிப்படையில் மதிப்பெண்கள் வழங்கப்படும். மிகுதியான மதிப்பெண்கள், மிகுதியான சுமையை குறிக்கும்.

தொழில்சார் காரணிகள் குறிப்பிட்ட மக்கள்தொகையுடன் தொடர்புடையதாக இல்லாமல் இருக்கலாம், இதுபோன்ற சந்தர்ப்பங்களில், இந்த காரணி பொருந்தாது எனக் கருதப்படலாம்.

பங்கேற்பாளர் மாணவராக இருக்கும் பட்சத்தில், தொழில்சார் காரணிகளில் பணிபுரியும் இடம் பள்ளி/கல்லூரி/வகுப்பறையாகக் கருதப்படலாம். சகபணியாளர்கள் என்பதற்கு பதிலாக நண்பரகள் அல்லது ஆசிரியர்கள் என்று பொருள் கொண்டு வினா தொடுக்கலாம்
