# Supplementary material for: Development and Validation of the Schizophrenia Disease Burden Scale: A Comprehensive Patient-Reported Outcome Measure Incorporating Socioeconomic and Cultural Contexts
Source: Research Square preprint supplement (doi:10.21203/rs.3.rs-5517158/v1), 2025-03-31
Supplement: Supplementary file 2 [file 8fbfb5d9ddb9ce4e2baa2f19.docx]

**SCHIZOPHRENIA DISEASE BURDEN SCALE**

**DOMAIN 1: COGNITIVE FACTOR**

| Question | 1 | 2 | 3 | 4 | 5 |
| --- | --- | --- | --- | --- | --- |
| Q1: It is challenging for me to comply with the requirements of my job. | Strongly disagree | Disagree | Neither agree nor disagree | Agree | Strongly agree |
| Q2: It is hard for me to finish tasks promptly or ahead of schedule. | Never | Rarely | Sometimes | Often | Always |
| Q3: It is hard for me to arrange/plan out how to accomplish a task. | Strongly disagree | Disagree | Neither agree nor disagree | Agree | Strongly agree |
| Q4: I can't work as efficiently as I used to. | Strongly disagree | Disagree | Neither agree nor disagree | Agree | Strongly agree |
| Q5: I lose concentration at work and find it difficult to concentrate on work-related activities. | Never | Rarely | Sometimes | Often | Always |
| Q6: I need others to remind or force me to take tablets. | Never | Rarely | Sometimes | Often | Always |

**DOMAIN 2: PSYCHOLOGICAL FACTORS**

| Question | 1 | 2 | 3 | 4 | 5 |
| --- | --- | --- | --- | --- | --- |
| Q7: I am financially insecure and do not have sufficient money to cover my expenditures. | Not at all | A little | Moderately | Very much | Completely |
| Q8: I am concerned about my job/education. | Never | Rarely | Sometimes | Often | Always |
| Q9: I frequently quit my job and change jobs. | Never | Rarely | Sometimes | Often | Always |
| Q10: I have a feeling of insecurity and am afraid of life. | Not at all | A little | Moderately | Very much | Completely |
| Q11: I am Hopeless. | Not at all | A little | Moderately | Very much | Completely |
| Q12: It is difficult for me to commit to a specific task/work for a longer period of time. | Strongly disagree | Dis-agree | Neither agree nor disagree | Agree | Strongly agree |
| Q13: I have thoughts of ending my life | Never | Rarely | Sometimes | Often | Always |

**DOMAIN 3: PERSONAL FCTORS I**

| Question | 1 | 2 | 3 | 4 | 5 |
| --- | --- | --- | --- | --- | --- |
| Q14: I receive no love, care, or affection from others. | Strongly disagree | Disagree | Neither agree nor disagree | Agree | Strongly agree |
| Q15: My family regards me as a burden. | Strongly disagree | Disagree | Neither agree nor disagree | Agree | Strongly agree |
| Q16: I am exasperated (irritated/agitated) by sudden or loud noises. | Never | Rarely | Sometimes | Often | Always |
| Q17: I'm feeling isolated. | Never | Rarely | Sometimes | Often | Always |

**DOMAIN 4: PERSONAL FACTORS II**

| Question | 1 | 2 | 3 | 4 | 5 |
| --- | --- | --- | --- | --- | --- |
| Q18. No one recognises my emotions or situations. | Strongly disagree | Disagree | Neither agree nor disagree | Agree | Strongly agree |
| Q19. When I prepare to attend a function or social gathering, I feel hardened or tense. | Not at all | A little | Moderately | Very much | Completely |
| Q20. I feel like I'm falling behind in life. | Not at all | A little | Moderately | Very much | Completely |

**DOMAIN 5: VOCATIONAL FACTORS**

| Question | 1 | 2 | 3 | 4 | 5 |
| --- | --- | --- | --- | --- | --- |
| Q21: How understanding are your colleagues at the workplace? | Very much understanding | understanding | Neutral | Not much understanding | Not at all understanding |
| Q22: How cooperative are your colleagues at the workplace? | Very much cooperative | cooperative | Neutral | Not much cooperative | Not at all cooperative |

**DOMAIN 6: PHYSICAL FACTORS**

| Question | 1 | 2 | 3 | 4 | 5 |
| --- | --- | --- | --- | --- | --- |
| Q23: I am undergoing hand shivering. | Never | Rarely | Sometimes | Often | Always |
| Q24: It is incredibly hard for me to sleep when I am not taking my medication. | Strongly disagree | Disagree | Neither agree nor disagree | Agree | Strongly agree |

**Core theme of questions**

Work efficiency: Q1, Q2,Q3,Q4,Q5

Self-care: Q6

Economy: Q7

Emotions: Q8, Q13, Q16

Behavior: Q9, Q10

Self-perception: Q11, Q12, Q20

Interpersonal relationship: Q14, Q17, Q18

Family interaction: Q15

Social participation: Q19

Work environment: Q21. Q22

Somatic symptom: Q23

Sleep: Q24

**Scoring:**

Scoring is based on 5-point Likert scale. The higher the score, higher the burden.

Vocational factors may not be relevant to certain population, in such cases the domain may be considered as not applicable while scoring. In case of student, work place in vocational factors may be considered as school/college and colleagues may be considered as peer friends and teachers.
